# Supplementary material
Source: Springer Nature journal article supplement (https://www.springermedizin.de/resource/supplementary/12987_2009_306_MOESM5_ESM.pdf/9611756)

CHOROID PLEXUS

CORTEX

HIPPOCAMPUS

POSITIVE CONTROL

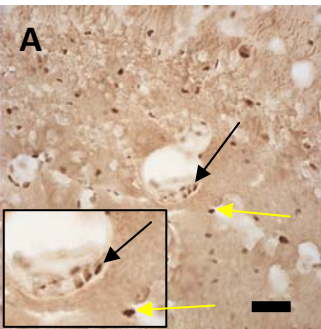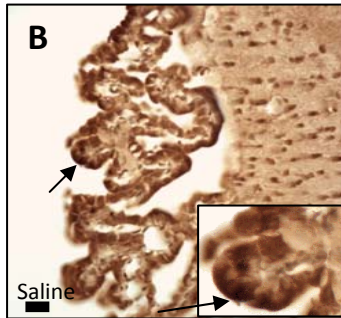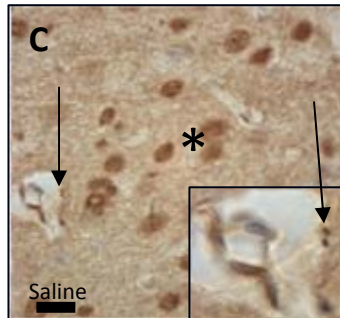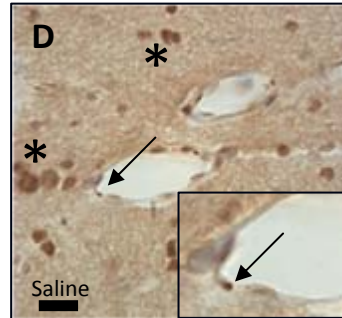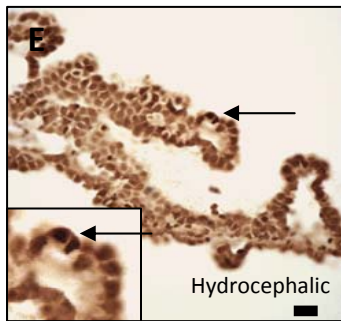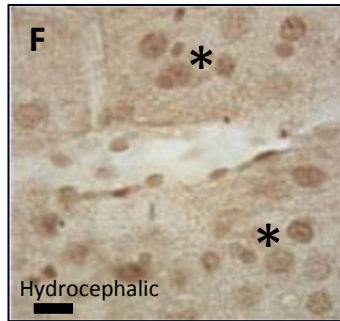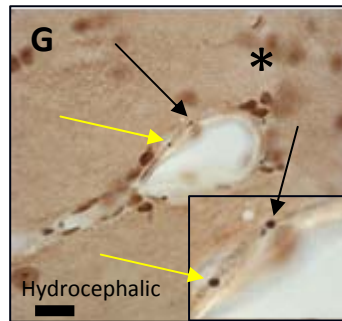

Supplement: MOESM5 [file 9611756]
